# Supplementary material for: High-Risk Alcohol Consumption among University Student in Cameroon and its association with Psychological Status, Drinking Motives and Practices: A Cross- Sectional Study at the University of Dschang
Source: Research Square preprint supplement (doi:10.21203/rs.3.rs-7151859/v1), 2025-08-20
Supplement: Supplementary file 1 [file 89f3c7c389a083a60cc5b64f.docx]

**ADDITIONAL FILE 1**

**High-Risk Alcohol Consumption among University Student in Cameroon and its association with Psychological Status, Drinking Motives and Practices: A Cross-Sectional Study at the University of Dschang**

**A description of the measuring instruments used**

Laurie-Anne TEJIODONKENG KEUAGHO 1, Sylvain Raoul SIMENI NJONNOU 1,2,3, Clarisse MAPA-TASSOU 4,5, Dominique Ken GUIMSOP 6, Jonas Guy BASSEGUIN ATCHOU 7, Fernando KEMTA LEKPA 1,3,8, Christian NGONGANG OUANKOU 1,3,9, Lewis FOKI TEINTANG 10, Guy Calvin Verlaine MBONGO’O NKO’O 1,11, Gustave Georges MBOE 12, Simeon Pierre CHOUKEM 1,3,4

**Affiliations**

1 Department of Internal Medicine and Specialties, Faculty of Medicine and Pharmaceutical Sciences, University of Dschang, Dschang, Cameroon;

2 Dschang Regional Hospital Annex, Dschang, Cameroon;

3 Health and Human Development (2HD) Research Network, Douala, Cameroon;

4 Department of Public Health, Faculty of Medicine and Pharmaceutical Sciences, University of Dschang, Dschang, Cameroon;

5 Ministry of Public Health, Yaounde, Cameroon;

6 Western Africa Regional Coordination Center, Africa Centers for Diseases Control and Prevention, Abuja, Nigeria

7 Department of Clinical Sciences, Faculty of Medicine and Pharmaceutical Sciences, University of Douala, Douala, Cameroon;

8 Douala General Hospital, Douala, Cameroon;

9 Yaounde Teaching Hospital, Yaounde, Cameroon;

10 Philosophy and Applied Social Sciences Research Unit, Faculty of Arts and Humanities, University of Dschang, Dschang, Cameroon;

11 Yaounde Jamot Hospital, Yaounde, Cameroon;

12 Department of Philosophy, Psychology and Sociology, Faculty of Letters and Human Sciences, University of Dschang, Dschang, Cameroon

Corresponding author: Laurie-Anne **TEJIODONKENG KEUAGHO**, Email:[tejiodonkenglaurieanne@gmail.com](mailto:Tejiodonkenglaurieanne@gmail.com)

Department of Internal Medicine and, Faculty of Medicine and Pharmaceutical Sciences, University of Dschang, Dschang, Cameroon

- - 1. **Measures**

The questionnaire consisted of six different instruments namely, the demographic and academic section, the Alcohol Use Disorders Identification Test (AUDIT) [1], the Children of Alcoholic Screening Test (CAST) [2], the Depression, Anxiety and Stress Scale 21 (DASS-21) [3], the Drinking Motive Questionnaire- Revised-Short Form (DMQ-R-SF) [4] and the practices related to alcohol consumption.

1. ***Demographic and academic section***

It contains questions relating to sex, age, religion, living arrangement, marital status, monthly allowance, attended faculty, academic level, academic performance and parents' educational level.

1. ***Alcohol Use Disorders Identification Test (AUDIT)***

The Alcohol Use Disorders Identification Test (AUDIT) was employed to help screen, categorize, and diagnose the prevalence of abstinence, hazardous drinking, harmful drinking, and addiction among students. The AUDIT is a brief 10-item, 5-point Likert scale, self-administered questionnaire, with responses ranging from 0 (never) to 4 (4+ times per week). The AUDIT has demonstrated a high degree of internal consistency, yielding a Cronbach’s Alpha score of 0.83, with a range of 0.75–0.97 [1].

1. ***Children of Alcoholic Screening Test (CAST)***

This is a tool that helps to identify, among many subjects, those who have alcoholics among their parents or other family members. The main aim of CAST is to assess the impact of parental alcoholism on children. It consists of thirty items to which subjects answer yes or no. The CAST tool looks at the whole of their experience of a parent's drinking problems. It assesses the feelings, attitudes, perceptions, and experiences of children confronted with their parents’ drinking. The questionnaire can be used with children, adolescents, and adults. The test was able to identify all children (100%) as alcoholics, regardless of whether alcohol abuse was self-reported or clinically diagnosed. Sensitivity was established at 78.4% and specificity at 98%, leaving few false positives (1.2%) compared with 9.3% false negatives [2]. In addition, this questionnaire accurately identified the children of adult alcoholics according to Charland and Côté (1996), regardless of gender.

1. ***Depression, Anxiety and Stress Scale 21 (DASS-21)***

DASS-21 measures depression, anxiety, and stress. It comprises 21 questions divided into three scales (7 items for each scale). The response scale is a 4-point Likert-type scale ranging from 0 meaning ‘does not apply to me at all’ to 3 meaning ‘applies to me entirely, or the vast majority of the time’. DASS-21 is gaining increasing support due to its strong psychometric properties. It has been discussed that DASS-21 has good internal consistency, excellent convergent validity, and good discriminator validity. There were three reasons for choosing this tool: The first, theoretical, is our interest in the three dimensions assessed by DASS-21. The second reason is their psychometric qualities in terms of reliability, construct validity, and concurrent validity [3]. The third reason is practical: DASS-21 comprises 21 questions, the application is simple, and the language used for the items is easy to understand.

1. ***Practices related to alcohol consumption***

This section aimed to assess the type of alcoholic beverages consumed and the participants’ different modes of consumption. It includes questions relating to the age and place of first consumption of alcoholic beverages, the type of beverage preferred, the place where it is most frequently consumed, the usual company, the use of other drugs, and the perception of alcohol***.***

1. ***Drinking Motive Questionnaire- Revised-Short Form (DMQ-R-SF)***

It is the most widely used instrument for assessing motives for drinking among young people. The original DMQ-R, consisting of 20 items, was developed to measure four motive dimensions for alcohol consumption: Enhancement, referring to the management of interpersonal tensions; Coping, referring to consumption to regulate emotions; Social, referring to social pleasure; and Conformity, referring to social conformity. 12 of these items were selected and included in the short form (DMQ-R-SF) to measure the same dimensions. Each item in the DMQ-R-SF was assessed by a relative frequency scale with the categories never (coded as 1), sometimes (coded as 2), and almost always (coded as 3). Each drinking motive dimension had a satisfactory-to-good internal consistency [4].

**REFERENCE:**

1. Saunders JB, Aasland OG, Babor TF, de la Fuente JR, Grant M. Development of the Alcohol Use Disorders Identification Test: WHO Collaborative Project on Early Detection of Persons with Harmful Alcohol Consumption--II. Addiction. 1993; 88:791–804.

2. Yamazaki S. Children of Alcoholics Screening Test and influence of parent’s drinking on their children. Nihon Koshu Eisei Zasshi. 1996; 43:1045–54.

3. Ali AM, Alkhamees AA, Hori H, Kim Y, Kunugi H. The Depression Anxiety Stress Scale 21: Development and Validation of the Depression Anxiety Stress Scale 8-Item in Psychiatric Patients and the General Public for Easier Mental Health Measurement in a Post COVID-19 World. Int J Environ Res Public Health. 2021;18(19):10142.

4. Kuntsche E, Kuntsche S. Development and validation of the Drinking Motive Questionnaire Revised Short Form (DMQ-R SF). J Clin Child Adolesc Psychol. 2009;38:899–908.
